# Supplementary material for: H5PV2Mo10O40 encapsulated into Cu3(BTC)2 as an efficient heterogeneous nanocrystalline catalyst for styrene epoxidation
Source: Royal Society of Chemistry journal article supplement (doi:10.1039/d0nj03473h), 2020-01-01
Supplement: d0nj03473h1.pdf [file d0nj03473h1.pdf]

Electronic Supplementary Material (ESI) for New Journal of Chemistry.

This journal is © The Royal Society of Chemistry

## *Supporting information*

# **H<sub>5</sub>PV<sub>2</sub>Mo<sub>10</sub>O<sub>40</sub> Encapsulated into Cu<sub>3</sub>(BTC)<sub>2</sub> as Efficient Nanocrystalline Heterogeneous Catalysts for Styrene Epoxidation**

Qian Yue, Ying Lu\*, Zhong Zhang, Hongrui Tian, Henan Wang, Xiaohui Li, Shuxia Liu\*

Key Laboratory of Polyoxometalate Science of the Ministry of Education, College of Chemistry,

Northeast Normal University, Changchun, Jilin 130024, P. R. China

### **Table of contents**

- 1. Experimental procedures**
- 2. Figure S1** Powder XRD of the simulated NENU-9 and NENU-9N with different ratio of solvent to reactant (a) 0, (b) 0.5 μLmg<sup>-1</sup>, (c) 1 μLmg<sup>-1</sup>, (d) 2 μLmg<sup>-1</sup>.
- 3. Figure S2** SEM images of NENU-9N with different ratio of solvent to reactant (a) 0, (b) 0.5 μLmg<sup>-1</sup>, (c) 1 μLmg<sup>-1</sup>, (d) 2 μLmg<sup>-1</sup>.
- 4. Figure S3** The UV-Vis spectra of HPMoV and the solution in which NENU-9 was soaked for 6h, 12h and 24h.
- 5. Figure S4** Styrene conversion versus reaction time at different reaction temperatures.
- 6. Figure S5** Selectivity of styrene oxide versus reaction time at different reaction temperatures.
- 7. Table S1** The catalytic effects of different catalysts on styrene epoxidation.
- 8. Figure S6** SEM of (a) NENU-9-0.7 μm and (b) NENU-9-1.5 μm.
- 9. Figure S7** Powder XRD of the simulated NENU-9 and NENU-9 with different particle sizes.
- 10. Figure S8** FT-IR spectra of NENU-9 with different particle sizes.
- 11. Figure S9** PXRD patterns of simulated NENU-9 and NENU-9N before and after recycling for 5 times.
- 12. Figure S10** FT-IR spectra of NENU-9 before and after recycling for 5 times.
- 13. Scheme S1** The production path of benzaldehyde for the epoxidation of styrene using isobutyraldehyde/O<sub>2</sub> reported in detail by Haber.
- 14. Supplemental Reference**

## 1. Experimental procedures

### Synthesis of NENU-9N by neat mechanical grinding method<sup>1</sup>

Cu(NO<sub>3</sub>)<sub>2</sub> · 3H<sub>2</sub>O (0.24 g, 1 mmol) and H<sub>5</sub>PV<sub>2</sub>Mo<sub>10</sub>O<sub>40</sub> · 34.5H<sub>2</sub>O (0.22 g, 0.092 mmol) were dissolved in deionized water (10 mL) and stirred for 20 min, then the pH of the solution was adjusted to 4 by using 1M NaOH. After evaporating the solvent, the collected solid sample was mixed with H<sub>3</sub>BTC (0.14 g, 0.67 mmol) and then the mixture was grounded in an agate mortar for 5 minutes. The yielded green solid material was washed several times with deionized water and ethanol respectively. After dried in an oven at 60 °C for 24 hours, NENU-9N with a diameter of about 150 nm was obtained.

### Synthesis of NENU-9N by liquid-assisted grinding method

Cu(NO<sub>3</sub>)<sub>2</sub> · 3H<sub>2</sub>O (0.24 g, 1 mmol) and H<sub>5</sub>PV<sub>2</sub>Mo<sub>10</sub>O<sub>40</sub> · 34.5H<sub>2</sub>O (0.22 g, 0.092 mmol) were dissolved in deionized water (10 mL) and stirred for 20 min, then the pH of the solution was adjusted to 4 by using 1M NaOH. After evaporating the solvent, the collected solid sample was mixed with H<sub>3</sub>BTC (0.14 g, 0.67 mmol) and ethanol (0.3 mL, 0.6 mL and 1.2 mL respectively) then the mixture was grounded in an agate mortar for 5 minutes to obtain green solid material. The yielded green solid material was washed several times with deionized water and ethanol respectively. After dried in an oven at 60 °C for 24 hours, NENU-9N with a diameter of about 100 nm, 70 nm and 80 nm were obtained.

### Synthesis of NENU-9 by solution method<sup>1</sup>

(a) Cu(OAc)<sub>2</sub> · H<sub>2</sub>O (0.2 g, 1 mmol) and H<sub>5</sub>PV<sub>2</sub>Mo<sub>10</sub>O<sub>40</sub> · 34.5H<sub>2</sub>O (0.22 g, 0.092 mmol) were dissolved in deionized water (10 mL) and stirred for 20 min, then the pH of the solution was adjusted to 2.5 by using 1M NaOH to obtain solution A. H<sub>3</sub>BTC (0.14 g, 0.67 mmol) was dissolved in ethanol (10 mL), and this solution was added dropwise to solution B with continuous stirring at room temperature. A green precipitate appeared gradually. The yielded green precipitate was washed several times with deionized water and ethanol respectively. After dried in an oven at 60 °C for 24 hours, NENU-9 with a diameter of 0.7 μm was obtained.

(b) Cu(NO<sub>3</sub>)<sub>2</sub> · 3H<sub>2</sub>O (0.24 g, 1 mmol) and H<sub>5</sub>PV<sub>2</sub>Mo<sub>10</sub>O<sub>40</sub> · 34.5H<sub>2</sub>O (0.22 g, 0.092 mmol) were dissolved in deionized water (10 mL) and stirred for 20 min, then the pH of the solution was adjusted to 2.5 by using 1M NaOH to obtain solution B. H<sub>3</sub>BTC (0.14 g, 0.67 mmol) was dissolved in ethanol (10 mL), and this solution was added dropwise to solution A with continuous stirring at room temperature. A green precipitate appeared gradually. The yielded green precipitate was washed several times with deionized water and ethanol respectively. After dried in an oven at 60 °C for 24 hours, NENU-9 with a diameter of 1.3 μm was obtained.

### Synthesis of NENU-9N by hydrothermal synthesis method<sup>2</sup>

Cu(NO<sub>3</sub>)<sub>2</sub> · 3H<sub>2</sub>O (0.24 g, 1 mmol) and H<sub>5</sub>PV<sub>2</sub>Mo<sub>10</sub>O<sub>40</sub> · 34.5H<sub>2</sub>O (0.22 g, 0.092 mmol) were dissolved in deionized water (10 mL) and stirred for 20 min, then H<sub>3</sub>BTC (0.21 g, 1 mmol) and [(CH<sub>3</sub>)<sub>4</sub>N]OH (0.09 g, 1 mmol) were added into the solution. The mixture was stirred for 30 min to obtain a turbid mixture. Then the turbid mixture was transferred into a Teflon-lined autoclave and heated at 180 °C for 24 h. Then the mixture was cooled to room temperature at a rate of 10 °C per hour, and green crystals were obtained.

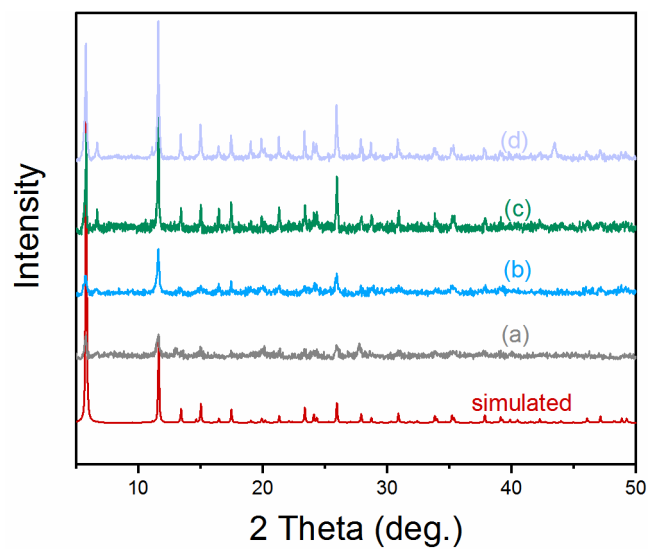

**Figure S1** Powder XRD of the simulated NENU-9 and NENU-9N with different ratio of solvent to reactant (a) 0, (b) 0.5 $\mu\text{Lmg}^{-1}$ , (c) 1 $\mu\text{Lmg}^{-1}$ , (d) 2 $\mu\text{Lmg}^{-1}$ .

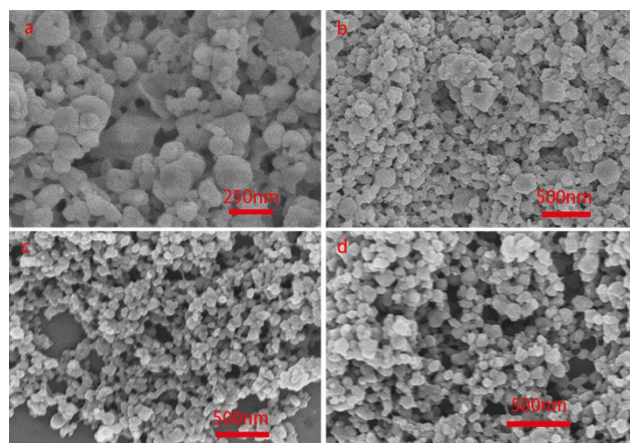

**Figure S2** SEM images of NENU-9N with different ratio of solvent to reactant (a) 0, (b) 0.5  $\mu\text{Lmg}^{-1}$ , (c) 1  $\mu\text{Lmg}^{-1}$ , (d) 2  $\mu\text{Lmg}^{-1}$ .

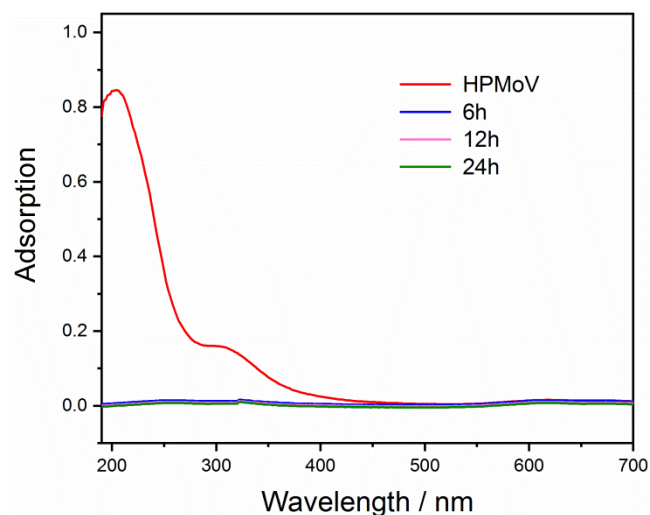

**Figure S3** The UV-Vis spectra of HPMoV and the solution in which NENU-9 was soaked for 6h, 12h and 24h.

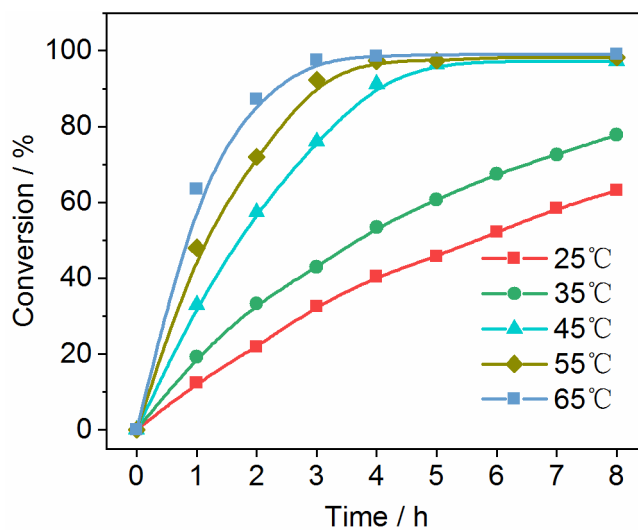

**Figure S4** Styrene conversion versus reaction time at different reaction temperatures. Reaction conditions: catalysts (0.005 mmol), styrene (4mmol), isobutyraldehyde (8 mmol), acetonitrile (10 mL).

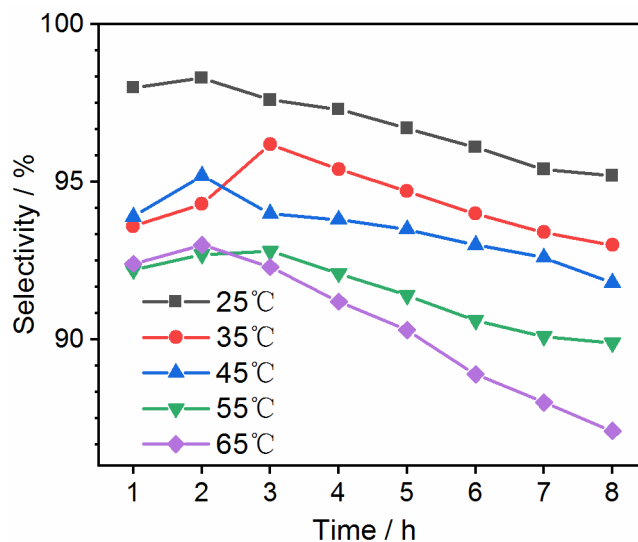

**Figure S5** Selectivity of styrene oxide versus reaction time at different reaction temperatures. Reaction conditions: catalysts (0.005 mmol), styrene (4 mmol), isobutyraldehyde (8 mmol), acetonitrile (10mL).

**Table S1** The catalytic effects of different catalysts on styrene epoxidation

| Entry | catalyst                                       | T/°C | styrene/co-reductant ratio | Time/h | conversion/% | selectivity/% | TOF/h <sup>-1</sup> | Ref.         |
|-------|------------------------------------------------|------|----------------------------|--------|--------------|---------------|---------------------|--------------|
| 1     | NENU-9N                                        | 45   | 1:2                        | 5      | 97.2         | 93.5          | 156                 | This work    |
| 2     | FeP-CMP                                        | 25   | 1:3                        | 24     | 55           | 69            | 22.9                | <sup>3</sup> |
| 3     | [Cu <sub>3</sub> (BTC) <sub>2</sub> ]          | 40   | 1:2                        | 6      | 58           | 58            | 5.7                 | <sup>4</sup> |
| 4     | IRMOF-3                                        | 40   | 1:2                        | 6      | 52.3         | 80.7          | 4.9                 | <sup>5</sup> |
| 5     | [Cu-Imace-H-H]<br>[BF <sub>4</sub> ]           | 60   | 1:1                        | 10     | 76           | 46            | 95                  | <sup>6</sup> |
| 6     | Fe <sub>3</sub> O <sub>4</sub> /<br>Fe-MIL-101 | 25   | 1:2                        | 4      | 11           | -             | 1                   | <sup>7</sup> |
| 7     | Co(II)@Cr-<br>MIL-101-P2I                      | 35   | 1:2                        | 24     | 80           | 59            | 3.28                | <sup>8</sup> |
| 8     | VO-Salen-SBA                                   | 80   | 1:2.5                      | 8      | 78.6         | 71.2          | 63                  | <sup>9</sup> |

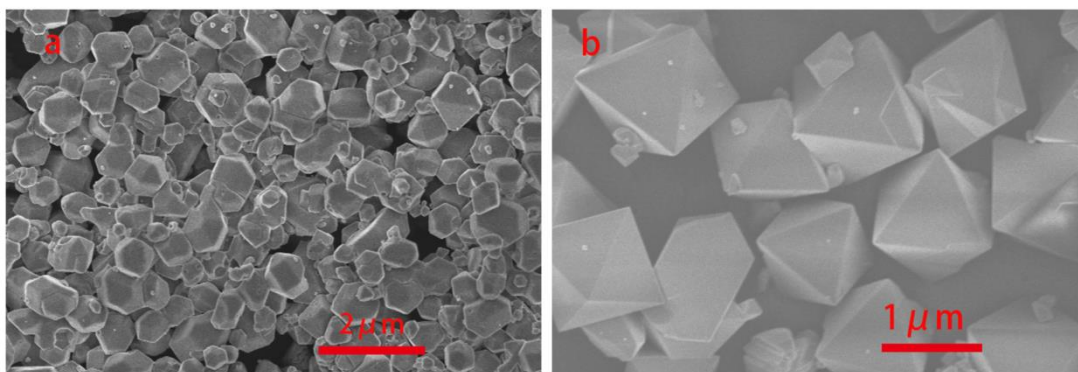

**Figure S6** SEM of (a) NENU-9-0.7 $\mu\text{m}$  and (b)NENU-9-1.5 $\mu\text{m}$ .

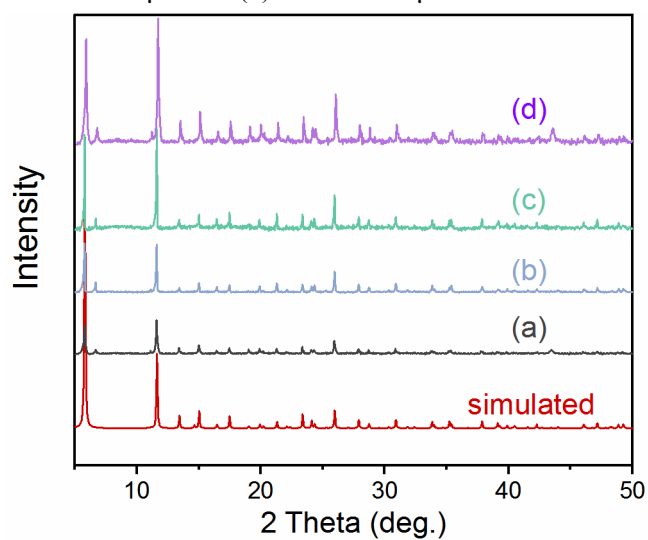

**Figure S7** Powder XRD of the simulated NENU-9 and NENU-9 with different particle sizes (a) 70 nm, (b) 0.7  $\mu\text{m}$ , (c) 1.5  $\mu\text{m}$ , (d) 300 $\mu\text{m}$ .

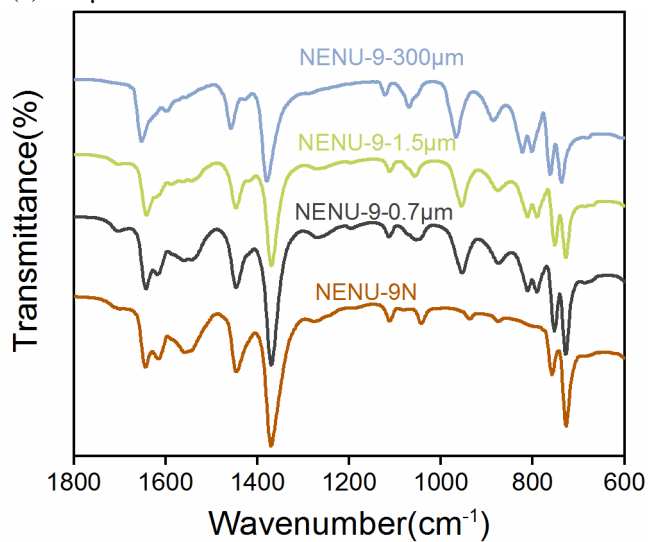

**Figure S8** FT-IR spectra of NENU-9 with different particle sizes.

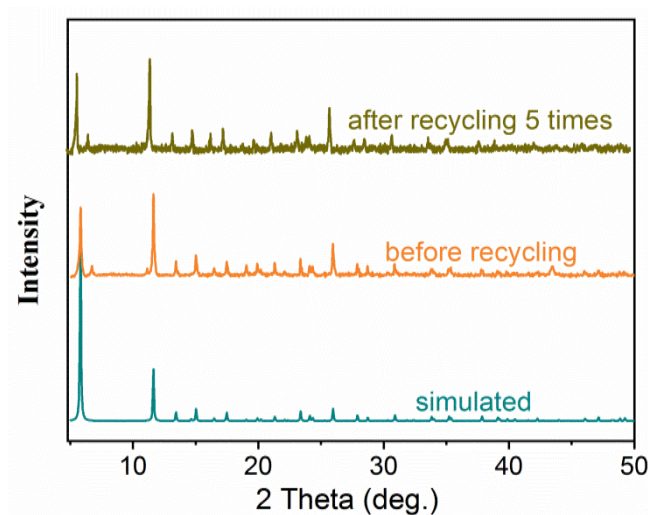

**Figure S9** PXR D patterns of simulated NENU-9 and NENU-9N before and after recycling for 5 times.

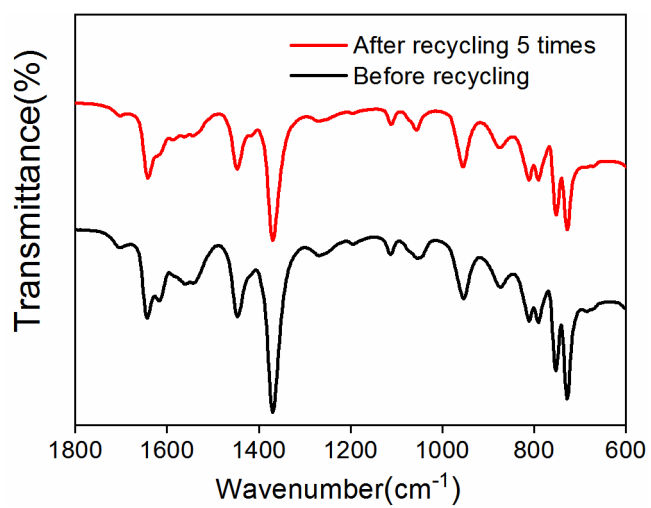

**Figure S10** FT-IR spectra of NENU-9 before and after recycling for 5 times.

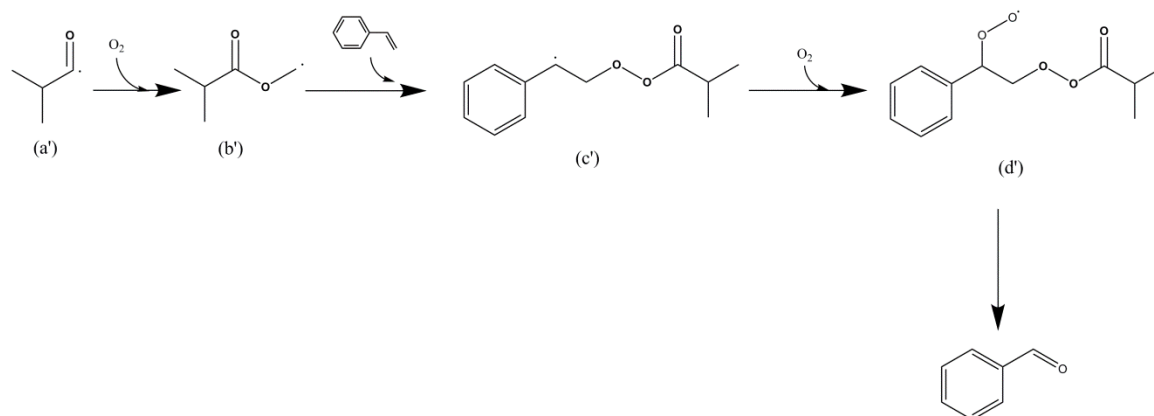

**Scheme S1** The production path of benzaldehyde for the epoxidation of styrene using isobutyraldehyde/ $O_2$  reported by Haber.<sup>10</sup>

## Supplemental References

1. Y. Liu, S. Liu, S. Liu, D. Liang, S. Li, Q. Tang, X. Wang, J. Miao, Z. Shi and Z. Zheng, *ChemCatChem*, 2013, **5**, 3086-3091.
2. C. Y. Sun, S. X. Liu, D. D. Liang, K. Z. Shao, Y. H. Ren and Z. M. Su, *J. Am. Chem. Soc.*, 2009, **131**, 1883-1888.
3. L. Chen, Y. Yang, Z. Guo and D. Jiang, *Adv. Mater.*, 2011, **23**, 3149-3154.
4. Y. Qi, Y. Luan, J. Yu, X. Peng and G. Wang, *Chem. – Eur. J.*, 2015, **21**, 1589-1597.
5. S. Bhattacharjee, D. A. Yang and W. S. Ahn, *Chem. Commun.*, 2011, **47**, 3637-3639.
6. G. Yang, H. Du, J. Liu, Z. Zhou, X. Hu and Z. Zhang, *Green Chem.*, 2017, **19**, 675-681.
7. Z. Jin, Y. Luan, M. Yang, Jia Tang, J. Wang, H. Gao, Y. Lu and G. Wang, *RSC Adv.*, 2015, **5**, 78962–78970.
8. J. Wang, M. Yang, W. Dong, Z. Jin, J. Tang, S. Fan, Y. Lu and G. Wang, *Catal. Sci. Technol.*, 2016, **6**, 161-168.
9. Y. Yang, Y. Zhang, S. Hao, J. Guan, H. Ding, F. Shang, P. Qiu and Q. Kan, *Appl. Catal., A*, 2010, **381**, 274-281.
10. J. Haber, M. Kłosowski and J. Połtowicz, *J. Mol. Catal. A: Chem.*, 2003, **201**, 167-178.
